# Supplementary material for: Pneumothorax Trends from 2010–2020 from a Large-Volume Pleural Unit
Source: Springer Nature journal article supplement (doi:10.1007/s41030-023-00232-0), 2023-07-06

## **Pneumothorax trends from 2010-2020 from a large volume pleural unit**

James Hyman<sup>1</sup>, Umair Falak<sup>1</sup>, Claire Storey<sup>1</sup>, Samuel Richardson<sup>1</sup>, Mariko Moffatt<sup>1</sup>, Avinash Aujayeb<sup>1</sup>

<sup>1</sup> Respiratory Department, Northumbria Healthcare NHS Foundation Trust, Newcastle, United Kingdom

Corresponding Author:

Dr Avinash Aujayeb MBBS MRCP, corresponding author, Tel: 07703343329, Email: [avinash.ujayeb@nhct.nhs.uk](mailto:avinash.ujayeb@nhct.nhs.uk) Northumbria HealthCare NHS Foundation Trust, Northumbria Way, Cramlington, Northumberland, NE23 6NZ

Graph 4 : Length of stay by management in PSP (x axis – year, y axis -median length of stay in days)

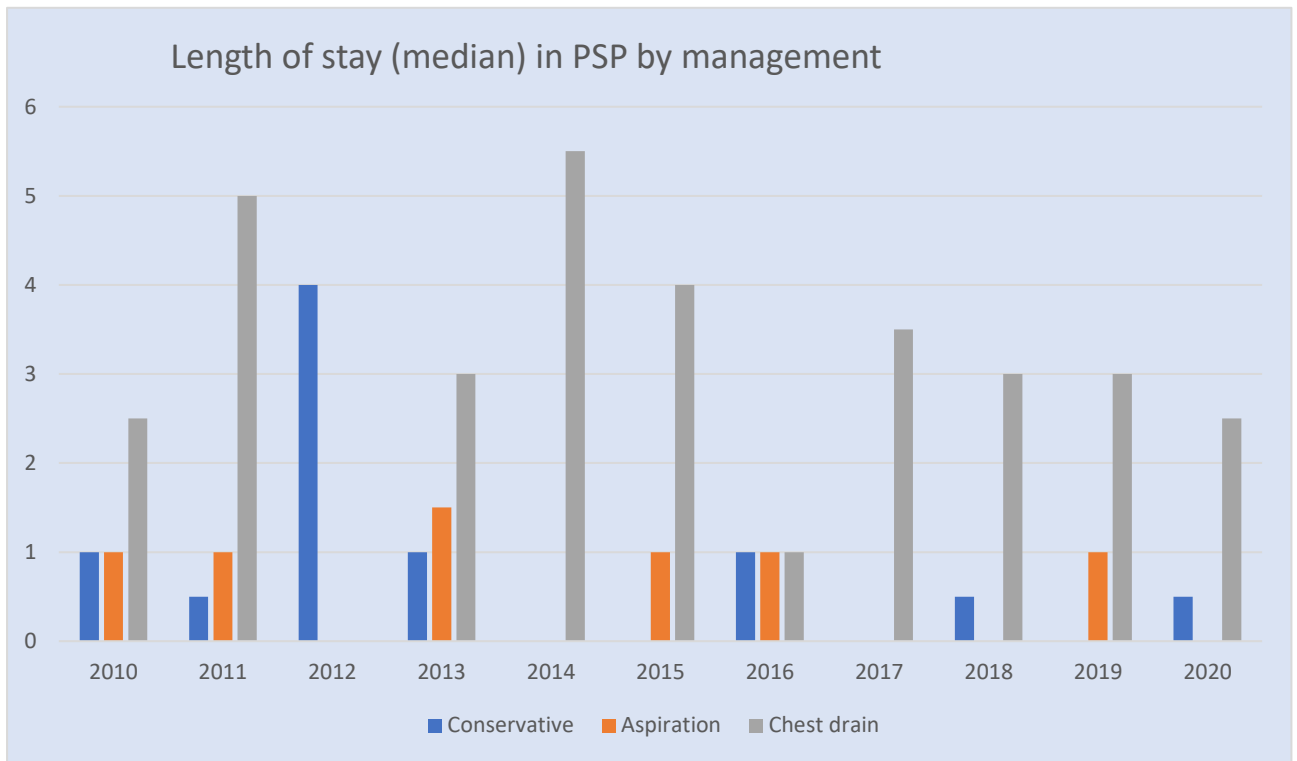

Graph 5: Length of stay by management in SSP (x axis- year, y axis – median length in days)

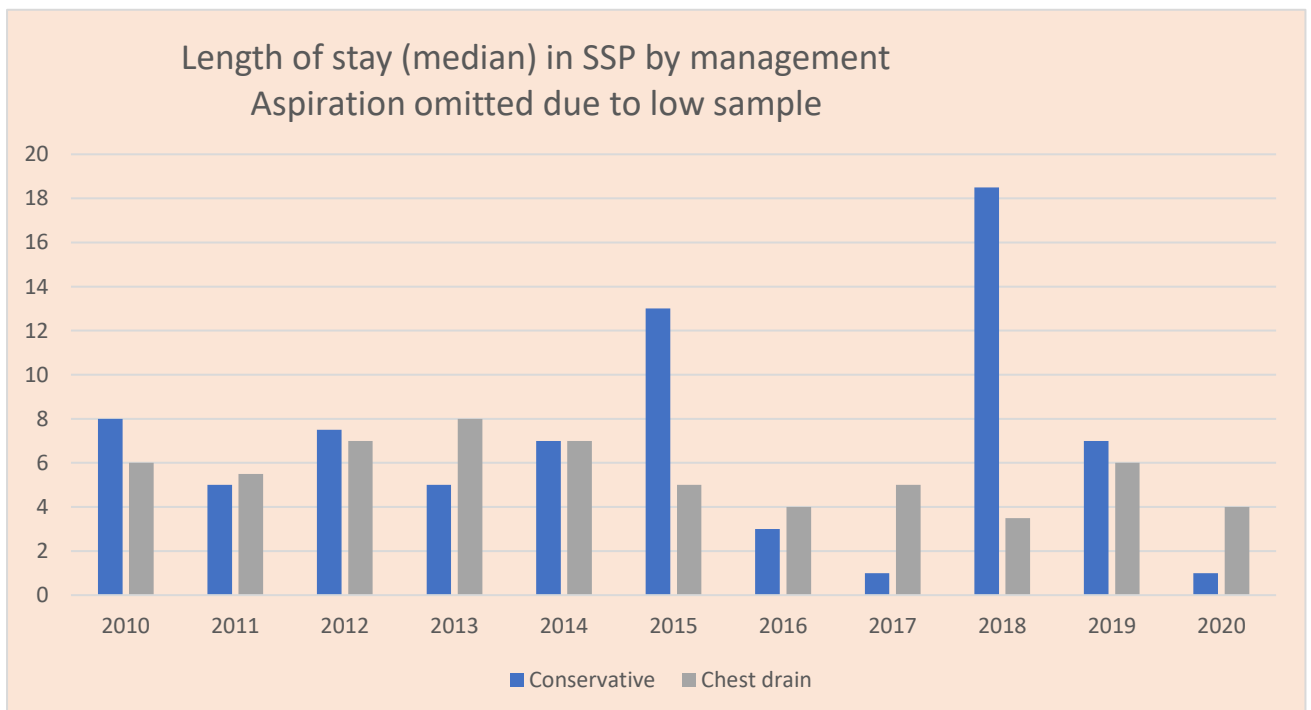

Graph 6: management of PSP over the years ((x axis- year, y axis – percentage of pneumothorax managed conservatively, aspirated or drained)

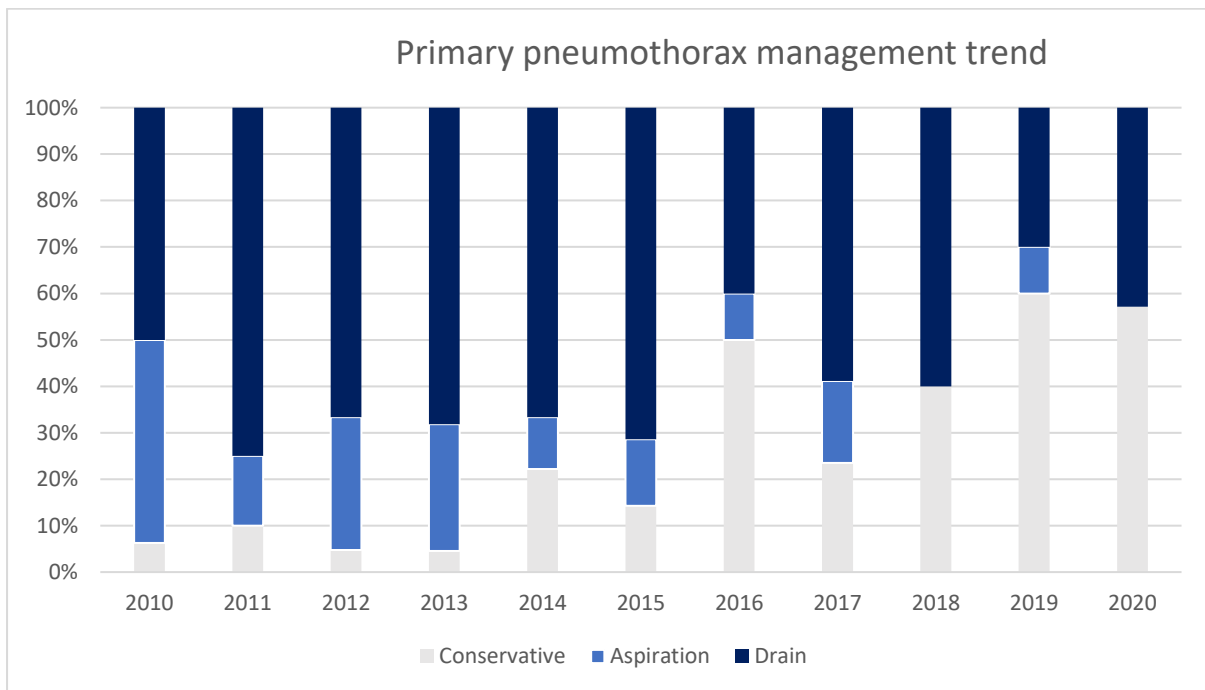

Graph 7: management of SSP over the years (x axis- year, y axis – percentage of pneumothorax managed conservatively, aspirated or drained)

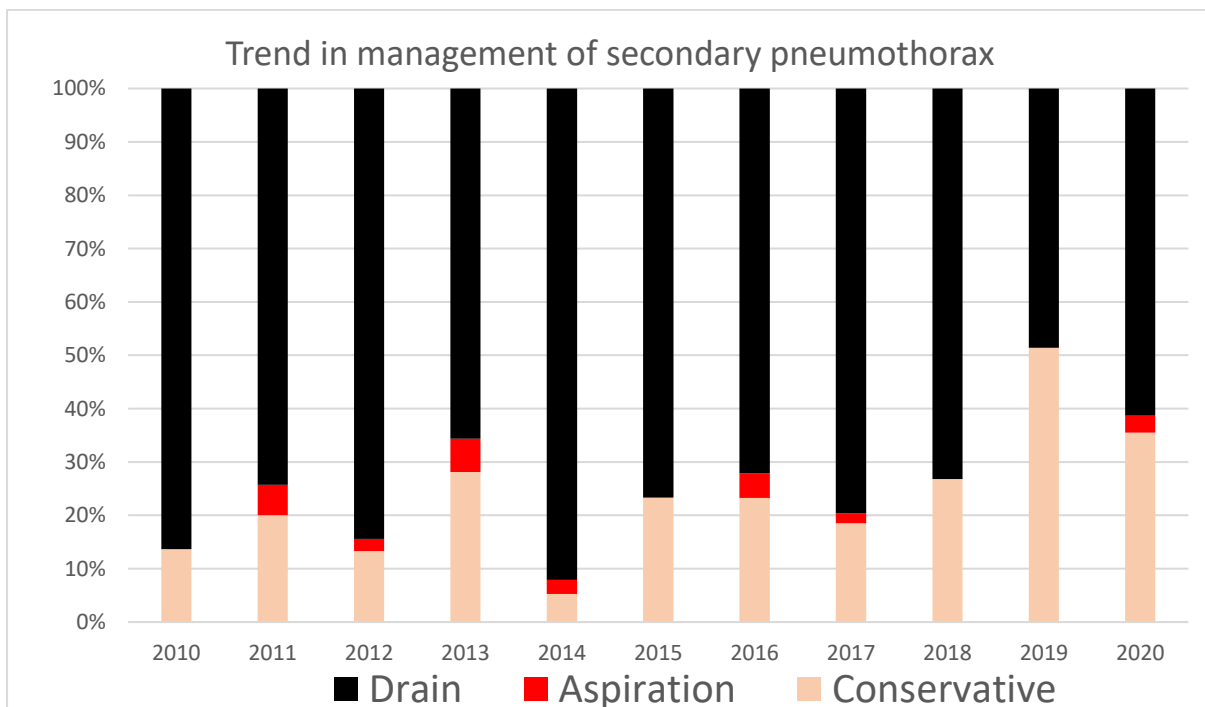

Graph 8: trend in PSP management with recurrence juxtaposed

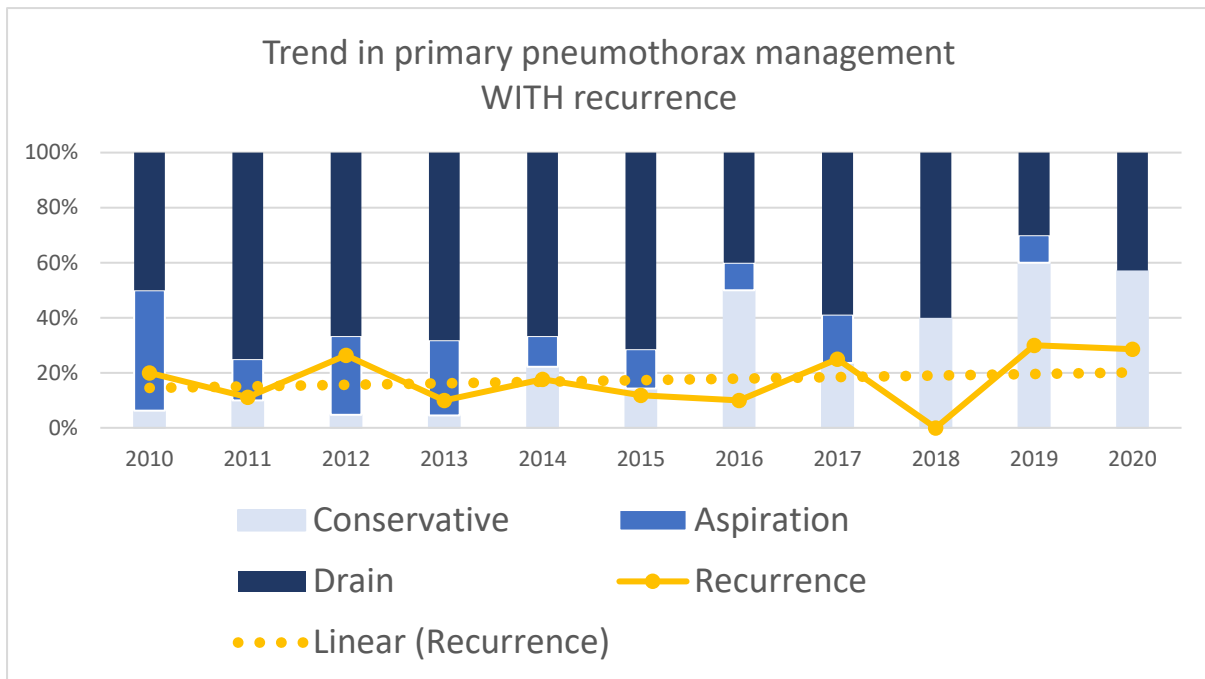

Graph 9: trend in SSP management with recurrence juxtaposed

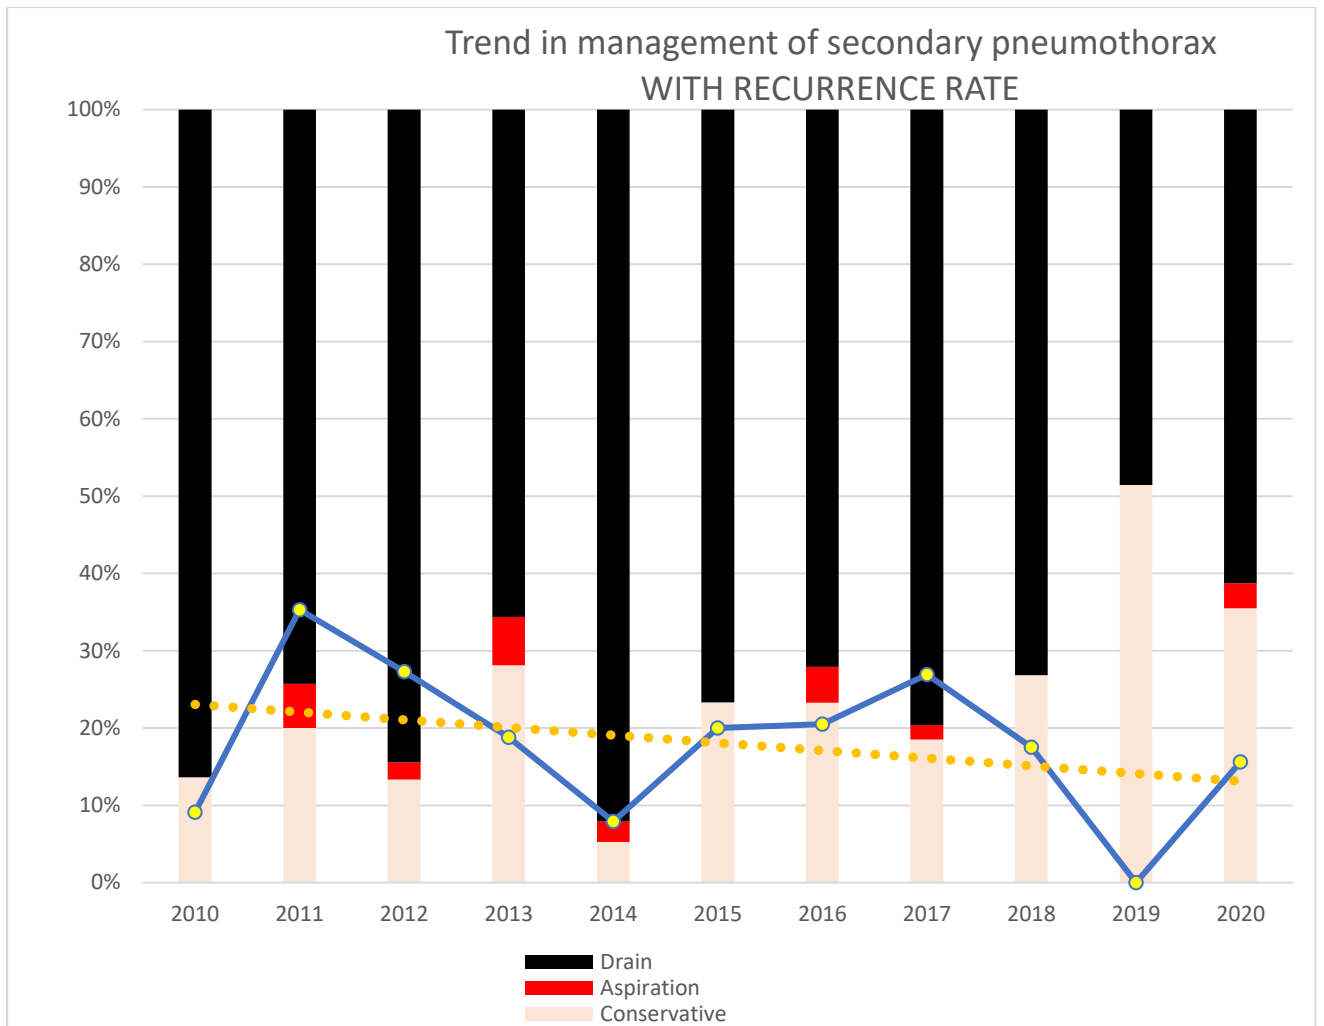

Graph 10: recurrence within monthly ranges (x axis – absolute number of recurrences, y axis- month range)

Frequency of recurrence (number of months)

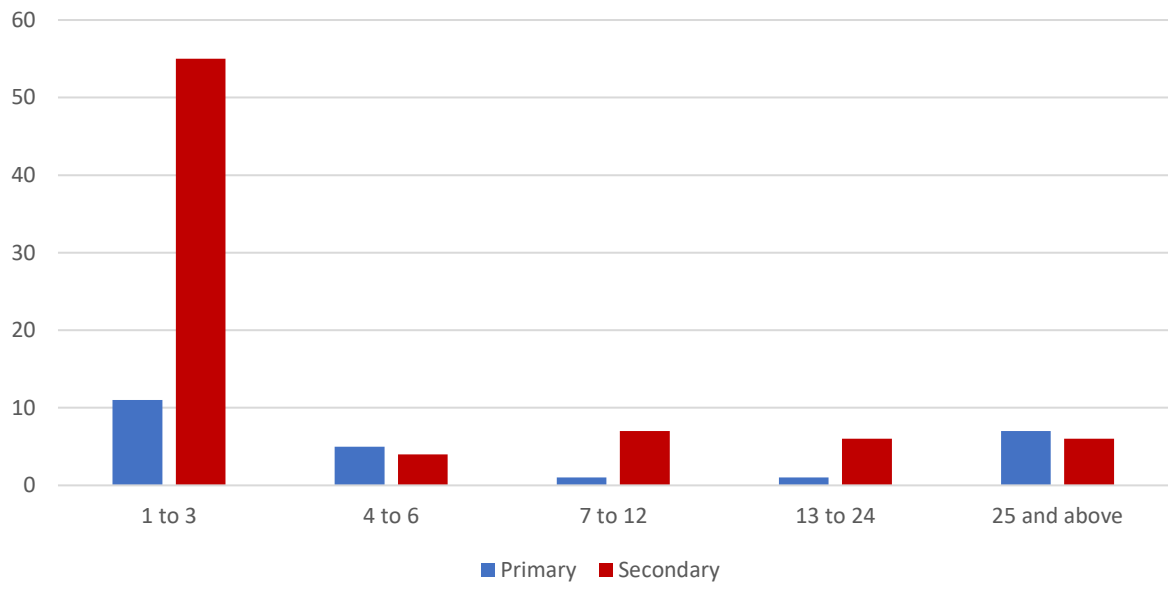

Supplement: MOESM1 [file 25582426]
